# Supplementary material for: The long and short of it: a comprehensive assessment of axial length estimation in myopic eyes from ocular and demographic variables
Source: Springer Nature journal article supplement (doi:10.1038/s41433-023-02899-w), 2024-01-10

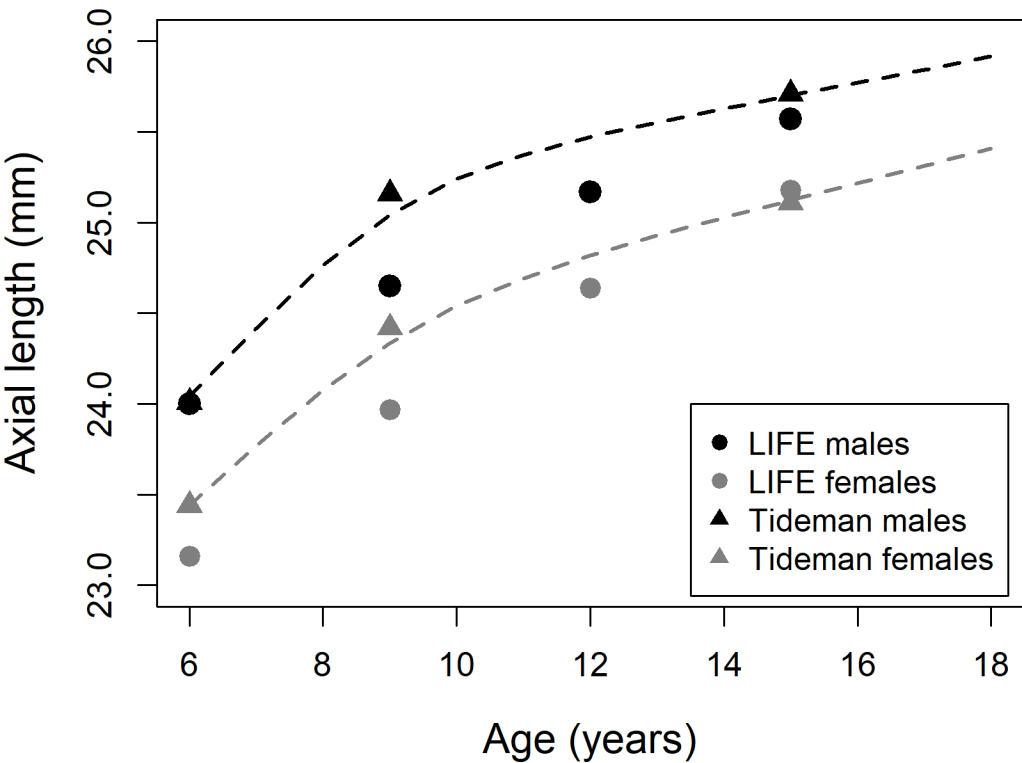

Supplement: 41433_2023_2899_MOESM5_ESM.pdf [file 41433_2023_2899_MOESM5_ESM.pdf]
